# Supplementary material for: Contrast-enhanced Ultrasound in evaluating of angiogenesis and tumor staging of nasopharyngeal carcinoma in nude mice
Source: PubMed Central journal article supplement (PMC6707564; doi:10.1371/journal.pone.0221638), 2019-08-23
Supplement: pone.0221638.s003.pdf [file pone.0221638.s003.pdf]

|                                                                                                                                                                                                                                                                                                                                                                                                                                                                                                                                                                                                          |                                                                                                                                                                                                                                                                                                       |                                     |                         |
|----------------------------------------------------------------------------------------------------------------------------------------------------------------------------------------------------------------------------------------------------------------------------------------------------------------------------------------------------------------------------------------------------------------------------------------------------------------------------------------------------------------------------------------------------------------------------------------------------------|-------------------------------------------------------------------------------------------------------------------------------------------------------------------------------------------------------------------------------------------------------------------------------------------------------|-------------------------------------|-------------------------|
| Concerned information written by applicant                                                                                                                                                                                                                                                                                                                                                                                                                                                                                                                                                               | Applicant: Shoujun Liang                                                                                                                                                                                                                                                                              |                                     |                         |
|                                                                                                                                                                                                                                                                                                                                                                                                                                                                                                                                                                                                          | Education of applicant: Master Degree                                                                                                                                                                                                                                                                 | Professional title: Resident Doctor |                         |
|                                                                                                                                                                                                                                                                                                                                                                                                                                                                                                                                                                                                          | Study title: Animal and human experiment study of contrast-enhanced ultrasound in the diagnosis of nasopharyngeal carcinoma                                                                                                                                                                           |                                     |                         |
|                                                                                                                                                                                                                                                                                                                                                                                                                                                                                                                                                                                                          | Aim of experiment: To explore the diagnostic and differential diagnostic value of Contrast-enhanced Ultrasound (CEUS) for nasopharyngeal carcinoma (NPC) transplantation tumor and explore the efficiency of CEUS in examination of changes in NPC before and after radiotherapy in nude mice models. |                                     |                         |
| Fund sources: The National Natural Science Foundation of China(grant number: 81560288)                                                                                                                                                                                                                                                                                                                                                                                                                                                                                                                   |                                                                                                                                                                                                                                                                                                       |                                     |                         |
| Source of animal: 1、 Experimental Animal Center of Guangxi Medical University<br>2、 Hunan SJA Laboratory Animal Co., Ltd                                                                                                                                                                                                                                                                                                                                                                                                                                                                                 |                                                                                                                                                                                                                                                                                                       |                                     |                         |
| Species or strain: BALB/c-nu                                                                                                                                                                                                                                                                                                                                                                                                                                                                                                                                                                             |                                                                                                                                                                                                                                                                                                       | Grade: SPF                          | Specifications: 4 weeks |
| Number: 100 (♀ 50 ; ♂ 50)                                                                                                                                                                                                                                                                                                                                                                                                                                                                                                                                                                                |                                                                                                                                                                                                                                                                                                       | Application date: August 2017       |                         |
| Entering date: August 2017                                                                                                                                                                                                                                                                                                                                                                                                                                                                                                                                                                               |                                                                                                                                                                                                                                                                                                       | Ending date: December 2019          |                         |
| Outline of experiments: experimental methods; observational index:                                                                                                                                                                                                                                                                                                                                                                                                                                                                                                                                       |                                                                                                                                                                                                                                                                                                       |                                     |                         |
| <p>1. The nude mice are randomly divided into NPC group、 Inflammatory group、 Radiotherapy group and Hemangioma group.</p> <p>2. Establish mice model of xenografts and use an Aplio 500 ultrasound equipment to obtain CEUS images of NPC、 inflammatory mass and hemangioma.</p> <p>3. Analyze the CEUS quantitative parameters: (1) peak intensity (PI), (2) time to peak (TTP), (3) mean transit time (MTT), (4) area wash in (AWI), (5) area wash out (AWO).</p> <p>Human endpoint or experimental terminative indicator:</p> <p>When the length, width and thickness of the tumor approach 2 cm.</p> |                                                                                                                                                                                                                                                                                                       |                                     |                         |
| Executing animal method:                                                                                                                                                                                                                                                                                                                                                                                                                                                                                                                                                                                 |                                                                                                                                                                                                                                                                                                       |                                     |                         |
| Nude mice were euthanized by CO2 overdose.                                                                                                                                                                                                                                                                                                                                                                                                                                                                                                                                                               |                                                                                                                                                                                                                                                                                                       |                                     |                         |
| Major measure for 3Rs:                                                                                                                                                                                                                                                                                                                                                                                                                                                                                                                                                                                   |                                                                                                                                                                                                                                                                                                       |                                     |                         |
| <p>1、 Strengthen nutrition for nude mice, improve experimental efficiency and shorten experimental time to improve the tolerance of nude mice and prolong life.</p> <p>2、 Establish models on both sides of the back of nude mice to improve the success rate of experiments.</p> <p>3、 Each mouse was anesthetized by inhalation of isoflurane (2% induction and 1.5% maintenance) through a Gas filter canister R510-31 (RWD, China).</p>                                                                                                                                                              |                                                                                                                                                                                                                                                                                                       |                                     |                         |
| Signature of applicant: Shoujun Liang                                                                                                                                                                                                                                                                                                                                                                                                                                                                                 |                                                                                                                                                                                                                                                                                                       |                                     | Telephone: 13197616366  |

|                       |                                                                                                                                                                                                                                                                                                                                                                                                                                                                                                                                                                                                                                                      |
|-----------------------|------------------------------------------------------------------------------------------------------------------------------------------------------------------------------------------------------------------------------------------------------------------------------------------------------------------------------------------------------------------------------------------------------------------------------------------------------------------------------------------------------------------------------------------------------------------------------------------------------------------------------------------------------|
| Results of inspection | Study director: Shangyong Zhu    Agree <input checked="" type="checkbox"/> Disagree <input type="checkbox"/> Signature <br>Opinion from laboratory animal facility:<br>Agree) <input checked="" type="checkbox"/> Disagree <input type="checkbox"/><br>The Animal Care & Welfare Committee:<br>Agree) <input checked="" type="checkbox"/> Disagree) <input type="checkbox"/> Signature <br>Stamp  |
| Supplement:           | First trial <input checked="" type="checkbox"/> reexamine No. <input type="checkbox"/>                                                                                                                                                                                                                                                                                                                                                                                                                                                                                                                                                               |

Notes : Animal ethics review follows the *Guiding Opinions on the Treatment of Laboratory Animals* issued by the Ministry of Science and Technology of the People's Republic of China and the *Laboratory Animal-Guideline for Ethical Review of Animal Welfare* issued by the National Standard GB/T35892-2018 of the People's Republic of China. If there are any uncertainties, please refer to these two documents or consult The Animal Care & Welfare Committee of Guangxi Medical University.
